# Supplementary material for: Proteinuria as a Biomarker for COVID-19 Severity
Source: PubMed Central journal article supplement (PMC7985082; doi:10.3389/fphys.2021.611772), 2021-03-09
Supplement: Table_1.pdf [file Table_1.pdf]

## **SUPPLEMENTAL MATERIAL TABLE OF CONTENTS**

Supplemental Table 1. Correlation between proteinuria and variables.

Supplemental Table 2. Characteristics of patients with and without acute kidney injury.

**Supplemental Table 1. Correlation between proteinuria and variables.**

| <b>Variables</b>               | <b>Spearman's rho</b> | <b>p value</b> |
|--------------------------------|-----------------------|----------------|
| Gender                         | 0.32                  | 0.03*          |
| Age, years                     | 0.43                  | 0.003*         |
| Days from onset                | -0.02                 | 0.89           |
| Hypertension                   | 0.13                  | 0.39           |
| ACEI/ARB                       | -0.16                 | 0.30           |
| Diabete mellitus               | 0.34                  | 0.02           |
| Systolic blood pressure, mmgh  | 0.23                  | 0.13           |
| Diastolic blood pressure, mmgh | 0.09                  | 0.55           |
| Hemoglobin, g/dl               | -0.13                 | 0.38           |
| Leukocytes, G/L                | 0.13                  | 0.40           |
| Lymphocytes, G/L               | -0.25                 | 0.10           |
| Neutrophils, G/L               | 0.22                  | 0.15           |
| Platelet, G/L                  | -0.008                | 0.96           |
| C-reactive protein, mg/l       | 0.41                  | 0.005*         |
| Procalcitonin, ng/ml           | 0.23                  | 0.16           |
| Albumin, g/L                   | -0.19                 | 0.25           |
| D-dimer, ng/ml                 | 0.63                  | <0.0001*       |
| Lactose deshydrogenase, U/L    | 0.25                  | 0.10           |
| Fibrinogen, g/l                | 0.25                  | 0.13           |
| Creatinine, µmol/l             | -0.06                 | 0.70           |
| BUN, mmol/l                    | 0.23                  | 0.13           |
| Hematuria                      | 0.24                  | 0.12           |
| Leukocyturia                   | 0.03                  | 0.86           |
| In-hospital death              | 0.12                  | 0.45           |
| Length of stay, days           | 0.61                  | <0.0001*       |

ACEI: angiotensin-converting-enzyme inhibitor; ARB: angiotensin II receptor blockers; BUN: blood urea nitrogen

**Supplemental Table 2. Characteristics of patients with and without acute kidney injury.**

| <b>Variables</b>                          | <b>AKI<br/>(n=12)</b> | <b>Non-AKI<br/>(n=33)</b> | <b>p value</b> |
|-------------------------------------------|-----------------------|---------------------------|----------------|
| Age, years                                | 67 (63-72)            | 59 (47-71)                | 0.12           |
| Male patients, n (%)                      | 12 (100)              | 19 (57.6)                 | 0.0006*        |
| Day from illness onset to admission, days | 9 (5-13)              | 8 (5-11)                  | 0.92           |
| Systolic blood pressure, mmgh             | 128 (120-140)         | 120 (120-133)             | 0.37           |
| Diastolic blood pressure, mmgh            | 76 (70-80)            | 75 (63-80)                | 0.73           |
| Respiratory disease, n (%)                | 3 (25.0)              | 6 (18.2)                  | 0.61           |
| Hypertension, n (%)                       | 8 (66.7)              | 9 (27.3)                  | 0.02*          |
| Diabetes mellitus, n (%)                  | 4 (33.3)              | 8 (24.2)                  | 0.54           |
| Cardiac disease, n (%)                    | 2 (16.7)              | 3 (9.1)                   | 0.47           |
| Vascular disease, n (%)                   | 2 (16.7)              | 1 (3.0)                   | 0.10           |
| Active and weaned smoking, n (%)          | 6 (50)                | 7 (21.2)                  | 0.06           |
| ACEI, n (%)                               | 0                     | 1 (3.0)                   | 0.54           |
| ARB, n (%)                                | 4 (33.3)              | 4 (12.1)                  | 0.1            |
| BMI (kg/m <sup>2</sup> )                  | 28 (26-34)            | 28 (24-32)                | 0.55           |
| C Reactive protein, mg/l                  | 102 (86-202)          | 86 (48-148)               | 0.16           |
| Procaciltonin, ng/ml                      | 0.44 (0.12-0.79)      | 0.20 (0.08-0.36)          | 0.08           |
| D-Dimer, ng/ml                            | 4628 (1501-6110)      | 1572 (555-4607)           | 0.07           |
| Proteinuria, g/g                          | 0.66±0.47             | 0.45±0.47                 | 0.1            |
| Hematuria, n (%)                          | 8 (66.7)              | 13 (39)                   | 0.10           |
| Leukocyturia, n (%)                       | 3 (25.0)              | 18 (54.5)                 | 0.08           |
| ICU admission, n (%)                      | 8 (66.7)              | 14 (42)                   | 0.15           |
| ARDS, n (%)                               | 6 (50.0)              | 9 (27.3)                  | 0.15           |
| Length of stay, days                      | 16 (9-25)             | 10 (5-24)                 | 0.22           |
| Secondary infection, n (%)                | 6 (50.0)              | 9 (27.3)                  | 0.15           |
| In-hospital death, n (%)                  | 1 (8.3)               | 1 (3.0)                   | 0.45           |

ACEI: angiotensin-converting-enzyme inhibitor; ARB: angiotensin II receptor blockers; ARDS: acute respiratory distress

syndrome, BMI: body mass index, BUN: blood urea nitrogen, ICU: intensive care unit.
